# Supplementary material for: Study on the effect of Sn concentration on the structural, optical, and electrical properties of (Al0.55In0.45)2O3:Sn films
Source: Royal Society of Chemistry journal article supplement (doi:10.1039/d0nj06088g), 2021-01-01
Supplement: d0nj06088g1.pdf [file d0nj06088g1.pdf]

## Supplementary Information

### Study on the effect of Sn concentration on the structural, optical and electrical properties of $(\text{Al}_{0.55}\text{In}_{0.45})_2\text{O}_3:\text{Sn}$ films

Yangmei Xin, Dong Zhang, Zizhan Li, Hua Qin, Junshan Xiu, Zhao Li\*, Yunyan Liu\*,

Huiqiang Liu\*,

School of Physics and Optoelectronic Engineering, Shandong University of  
Technology, Zibo 255000, China

\*Corresponding author: zli@sdut.edu.cn (Z. Li), liuyysdut@163.com (Y. Liu),

liuhq@sdut.edu.cn (H. Liu)

This paper is considered to be published in New Journal of Chemistry with the  
manuscript ID number: NJ-ART-12-2020-006088

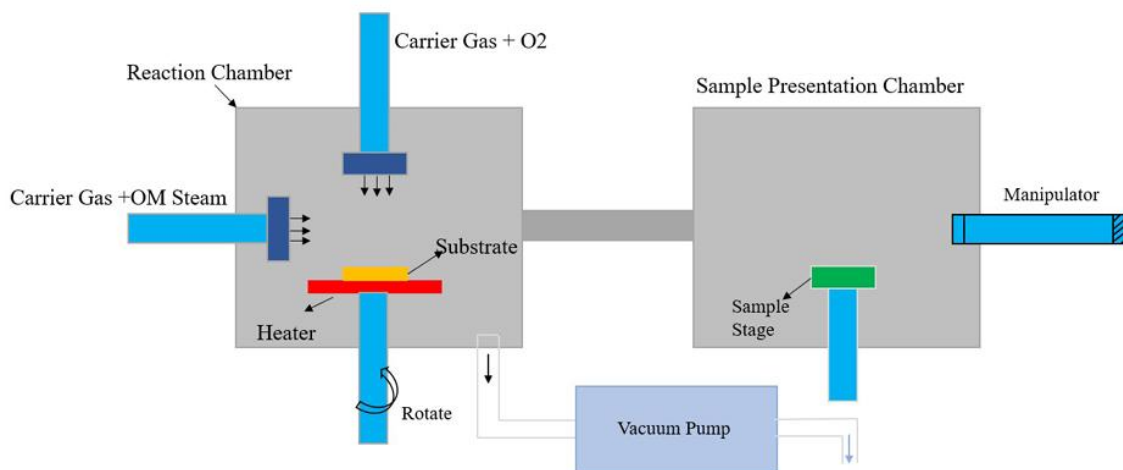

Fig. S1 The graphical representation of the apparatus used for MOVPE deposition in this work

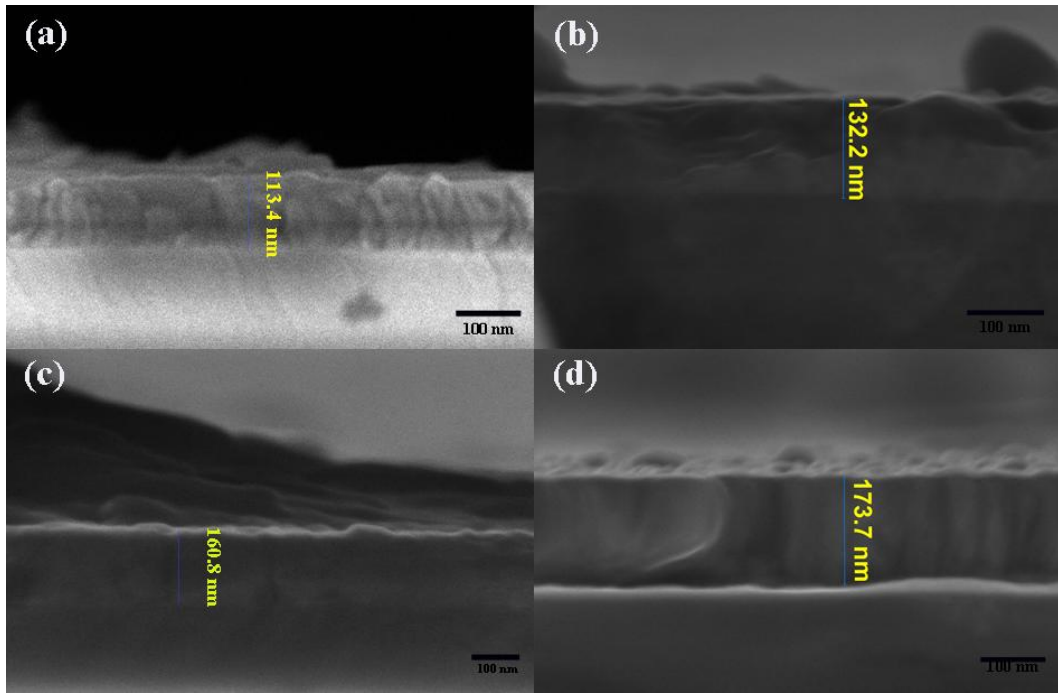

Fig. S2 Cross-sectional SEM images of  $(\text{Al}_{0.55}\text{In}_{0.45})_2\text{O}_3:\text{Sn}$  films with different Sn contents: (a) 0, (b) 12%, (c) 21%, (d) 24%
